# Supplementary material for: Carbon nanotube-supported Cu3N nanocrystals as a highly active catalyst for oxygen reduction reaction
Source: Royal Society of Chemistry journal article supplement (doi:10.1039/c5ta04383b), 2015-01-01
Supplement: c5ta04383b1.pdf [file c5ta04383b1.pdf]

*Supporting information to*

## **Carbon Nanotube-Supported Cu<sub>3</sub>N Nanocrystals as Highly Active Catalyst for Oxygen Reduction Reaction**

Chung-Yi Su<sup>a</sup>, Bo-Heng Liu<sup>b</sup>, Tz-Jiun Lin<sup>c</sup>, Yi-Min Chi<sup>a</sup>, Chi-Chung Kei<sup>b</sup>, Kuan-Wen Wang<sup>c</sup>, and Tsong-Pyng Perng<sup>a\*</sup>

<sup>a</sup>Department of Materials Science and Engineering, National Tsing Hua University, Hsinchu 300, Taiwan

<sup>b</sup>Instrument Technology Research Center, National Applied Research Laboratories, Hsinchu 300, Taiwan

<sup>c</sup>Institute of Materials Science and Engineering, National Central University, Taoyuan 320, Taiwan

**KEYWORDS** : *atomic layer deposition, copper nitride, electrochemistry, fuel cell, oxygen reduction reaction*

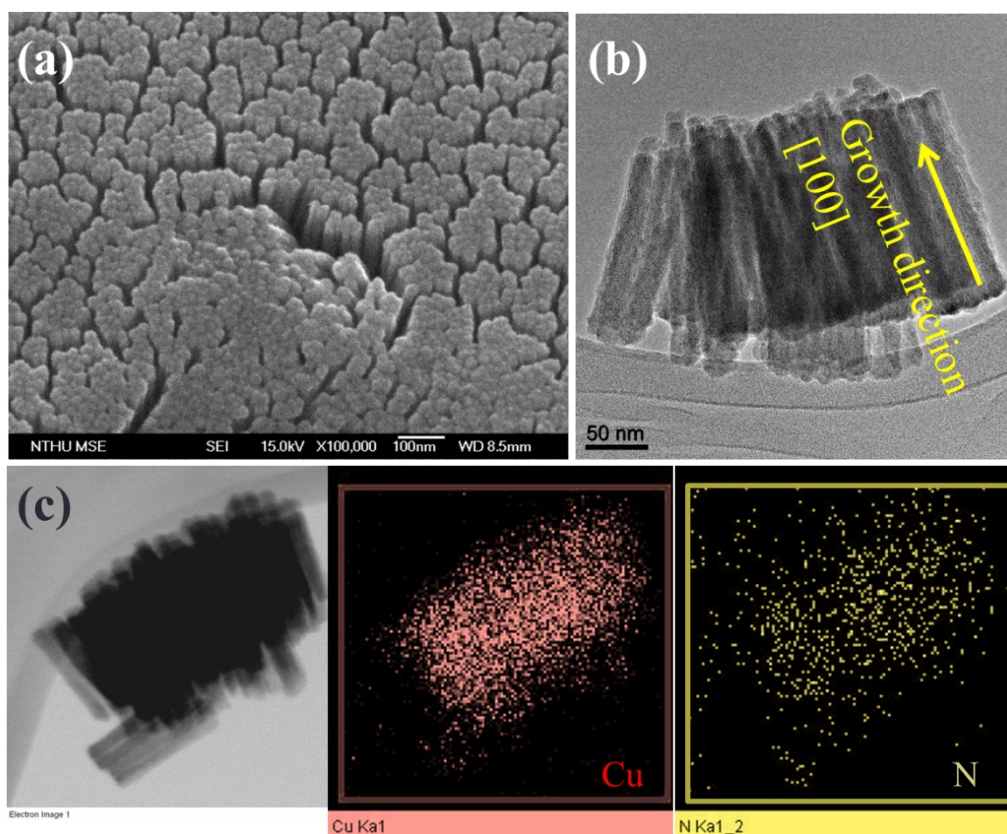

**Figure S1.** (a) SEM and (b) TEM images of Cu<sub>3</sub>N nanorods grown on silicon substrate prepared by 800 cycles of ALD with ammonia gas activated plasma. (c) Elemental mappings of Cu<sub>3</sub>N nanorods.

| Element | Weight% | Atomic% |
|---------|---------|---------|
| N K     | 6.76    | 24.74   |
| Cu K    | 93.24   | 75.26   |

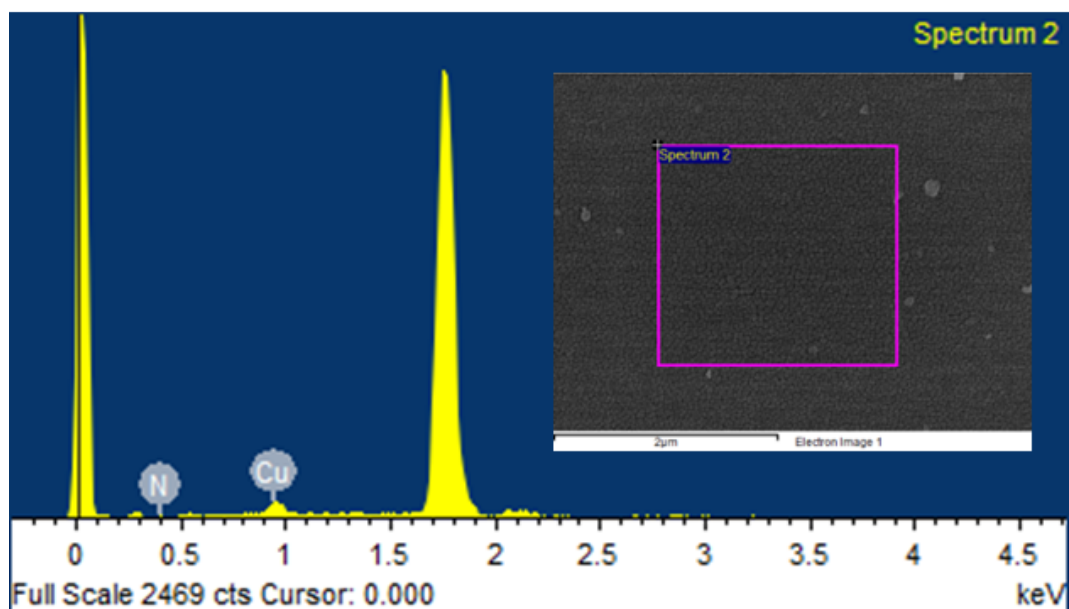

**Figure S2.** EDX spectrum of Cu<sub>3</sub>N nanoparticles prepared by 400 cycles of ALD on silicon substrate.

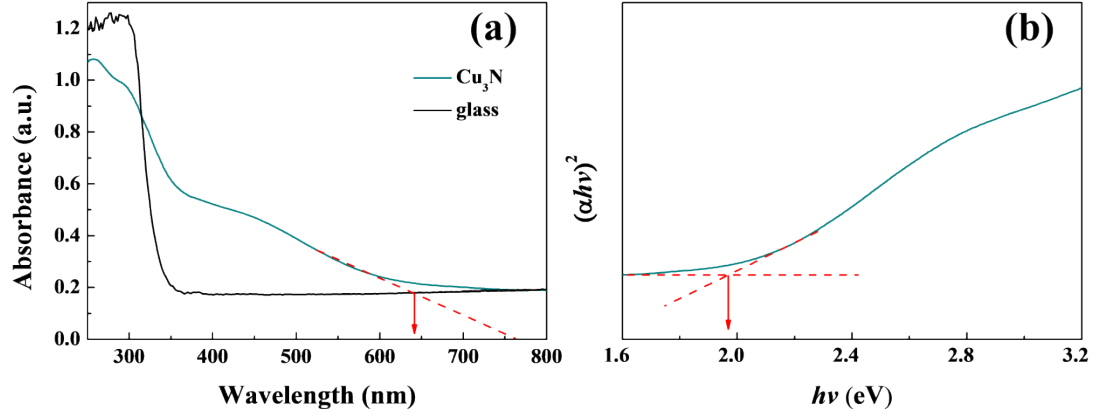

**Figure S3.** (a) UV-vis absorption spectrum and (b) Tauc plot of Cu<sub>3</sub>N nanoparticles directly deposited on glass substrate by 400 cycles of ALD.  $E_g$  can be calculated from the absorbance data using the Tauc equation  $ah\nu=A(h\nu- E_g)^m$ , where  $a$  is the absorption coefficient,  $A$  is a constant related to the effective masses of electrons and holes, and  $m=1/2$  for allowed direct transition.

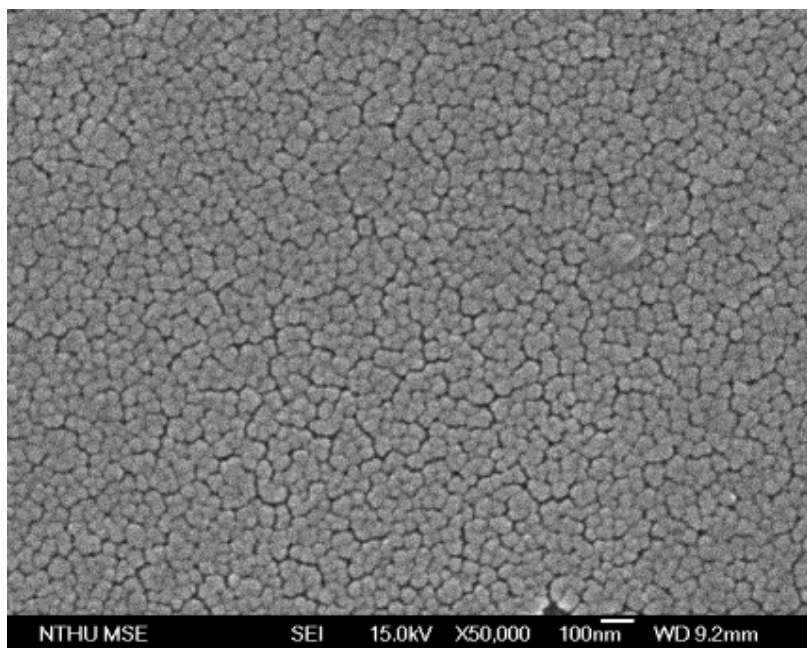

**Figure S4.** SEM image of Cu<sub>3</sub>N nanoparticles grown on silicon substrate by 400 cycles of ALD.

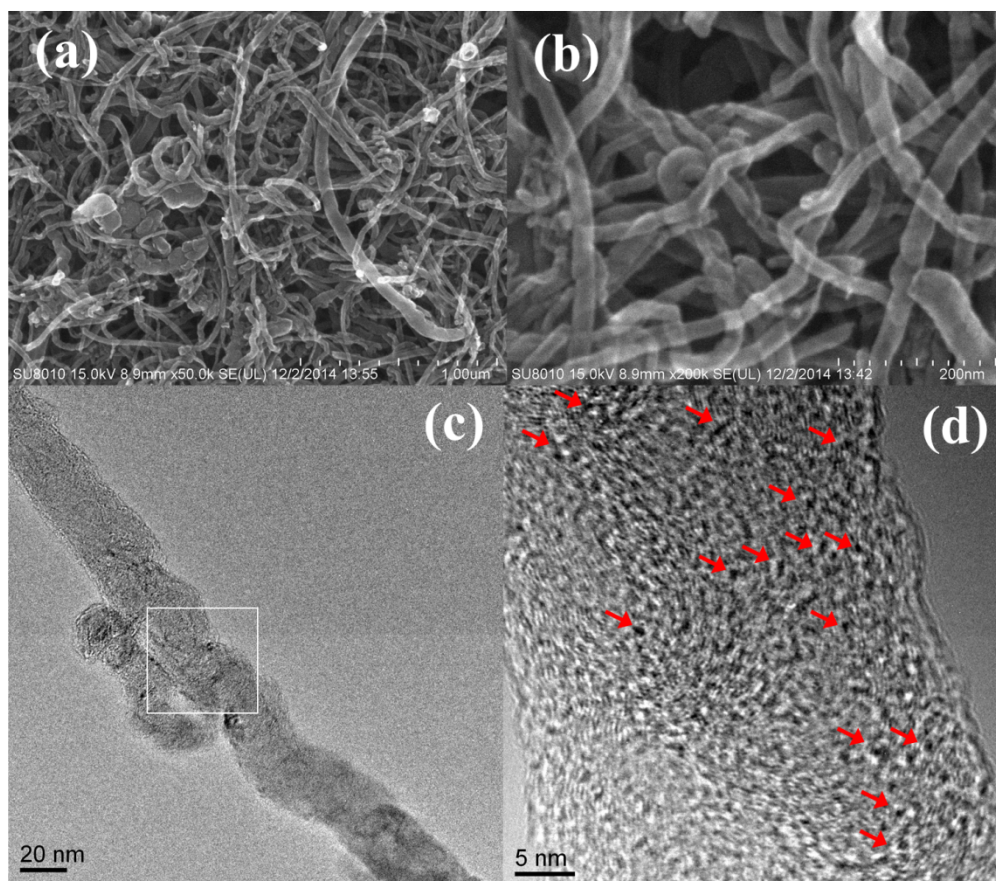

**Figure S5.** (a) and (b) SEM images and (c) and (d) TEM images at two magnifications of Cu<sub>3</sub>N nanoparticles grown on acid-treated CNTs by 50 cycles of ALD.

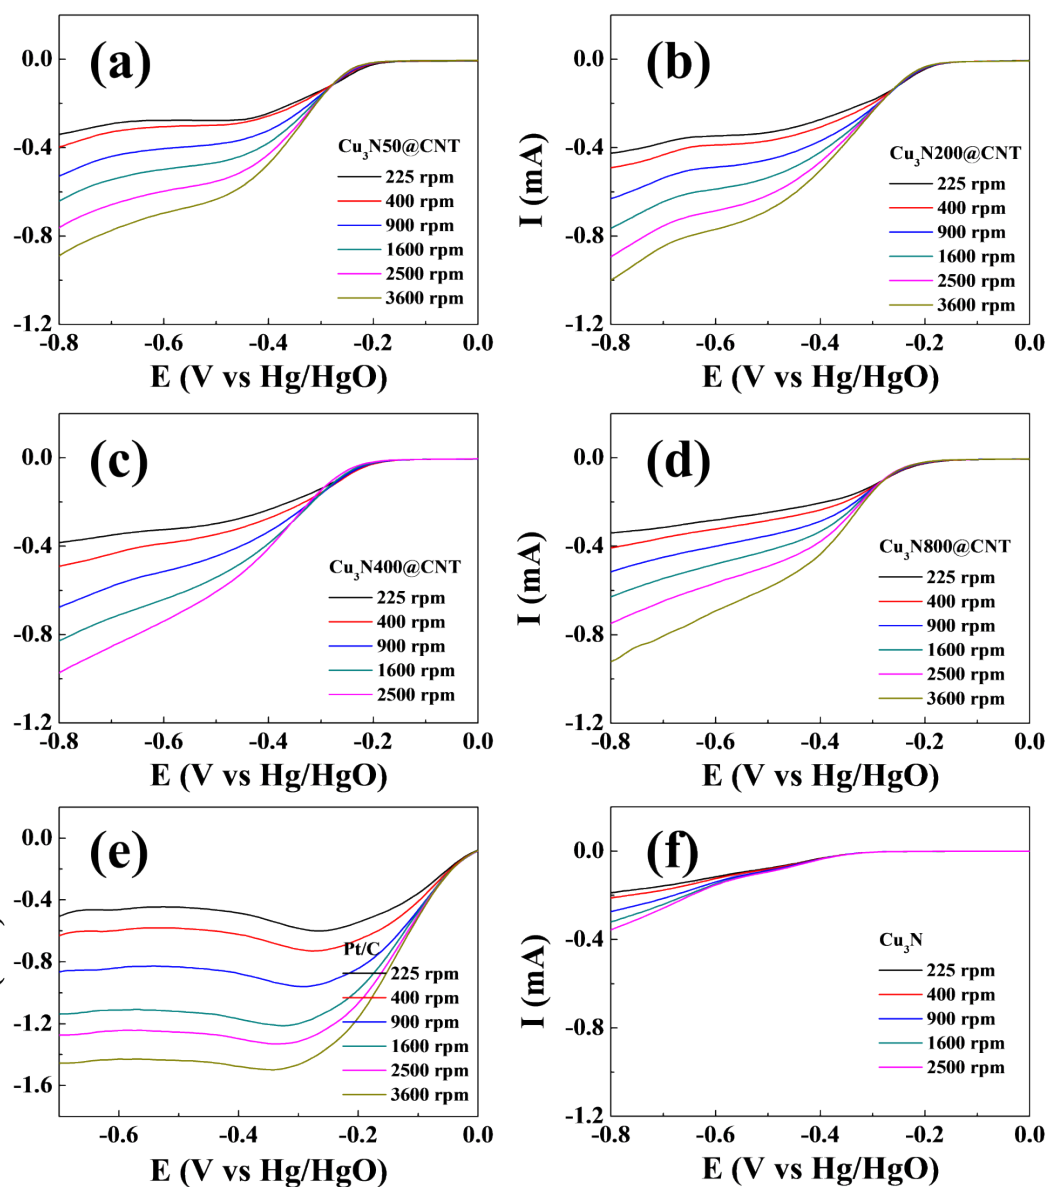

**Figure S6.** Rotating disk voltammograms for  $\text{Cu}_3\text{N}$  nanoparticles deposited on CNTs by (a) 50, (b) 200, (c) 400, and (d) 800 cycles of ALD in  $\text{O}_2$ -saturated 0.1M KOH solution. The voltammograms for (e) Pt/C and (f) free  $\text{Cu}_3\text{N}$  nanoparticles are included as the references.
